# Supplementary material
Source: Research Square preprint supplement (doi:10.21203/rs.3.rs-10391736/v1)
Supplement: Supplementary file 1 [file 540a16b79a8b883c9e129374.docx]

# Supplementary material

The following supplementary tables retain the detailed information from the source manuscript and should be submitted either as supplementary material or retained at the end of the manuscript during internal revision.

Supplementary Table S1. Clinical presentation of all 882 lesions (detailed source table).

| **Characteristic** | **Systemic disease** | **Healthy** | **Total** | **p value** |
| --- | --- | --- | --- | --- |
| Exophytic lesion | 78 (8.8) | 199 (22.6) | 277 (31.4) | <0.0001 |
| Ulcerations/erosions - traumatic | 32 (3.6) | 58 (6.6) | 90 (10.2) | 0.1092 |
| Ulcerations/erosions - other | 69 (7.8) | 22 (2.5) | 91 (10.3) | 0.0341 |
| Ulcerations/erosions - total | 101 (11.4) | 80 (9.1) | 181 (20.5) | 0.0182 |
| Aphthae | 25 (2.8) | 71 (8.0) | 96 (10.8) | 0.0209 |
| Aphthous-like lesions | 63 (7.1) | 53 (6.0) | 116 (13.1) | 0.4812 |
| Candidiasis | 38 (4.3) | 38 (4.3) | 74 (8.6) | 0.9998 |
| Trauma - linea alba | 4 (0.5) | 21 (2.4) | 25 (2.9) | 0.0162 |
| Trauma - mechanical | 4 (0.5) | 17 (1.9) | 21 (2.4) | 0.3610 |
| Trauma - thermal | 0 (0.0) | 3 (0.3) | 3 (0.3) | 0.9999 |
| Trauma - chemical | 2 (0.2) | 0 (0.0) | 2 (0.2) | 0.9999 |
| Herpes simplex | 5 (0.6) | 8 (0.9) | 13 (1.5) | 0.9091 |
| Herpetic stomatitis | 12 (1.4) | 2 (0.2) | 14 (1.6) | 0.8192 |
| Angular cheilitis | 21 (2.4) | 14 (1.6) | 35 (4.0) | 0.2561 |
| Lichenoid lesions | 15 (1.7) | 1 (0.1) | 16 (1.8) | 0.9956 |
| Hyperkeratotic lesions in hyper-IgE/HSCT | 7 (0.8) | 0 (0.0) | 7 (0.8) | 0.9999 |

Rows are not mutually exclusive; percentages follow source table denominators.

Supplementary Table S2. Location of all 882 lesions (detailed source table).

| **Location** | **Systemic disease** | **Healthy** | **Total** | **p value** |
| --- | --- | --- | --- | --- |
| Upper gingiva/alveolar process of maxilla | 42 (4.8) | 55 (6.2) | 97 (11.0) | 0.3608 |
| Lower gingiva/alveolar part of mandible | 48 (5.4) | 69 (7.8) | 117 (13.2) | 0.4511 |
| Tongue | 73 (8.3) | 91 (10.3) | 164 (18.6) | 0.3512 |
| Lip | 61 (6.9) | 83 (9.4) | 144 (16.3) | 0.1821 |
| Floor of the mouth | 57 (6.4) | 79 (9.5) | 136 (15.9) | 0.3511 |
| Buccal mucosa | 68 (7.7) | 90 (10.2) | 158 (17.9) | 0.1821 |
| Palate | 26 (2.9) | 40 (4.5) | 66 (7.4) | 0.3521 |

Supplementary Table S3. Biopsied subgroup demographic characteristics.

| **Variable** | **Systemic disease** | **Healthy** | **Total** |
| --- | --- | --- | --- |
| Biopsied patients | 104 (33.0) | 211 (67.0) | 315 (100.0) |
| Girls | 38 (36.5) | 113 (53.5) | 151 (47.9) |
| Boys | 66 (63.5) | 98 (46.5) | 164 (52.1) |
| <1 year | 7 (6.7) | 35 (16.6) | 42 (13.3) |
| 1-6 years | 25 (24.0) | 86 (40.8) | 111 (35.2) |
| 6-12 years | 41 (39.4) | 62 (29.4) | 103 (32.7) |
| 12-18 years | 31 (29.8) | 28 (13.3) | 59 (18.7) |
| Age, months, mean +/- SD | 106.48 +/- 61.44 | 70.45 +/- 57.85 | 83.73 +/- 62.05 |

Corrected age totals from source cell counts.

Supplementary Table S4. Biopsied lesion location by age group and systemic status.

| **Location** | **Sys <1** | **Sys 1-6** | **Sys 6-12** | **Sys 12-18** | **Healthy <1** | **Healthy 1-6** | **Healthy 6-12** | **Healthy 12-18** | **Total** |
| --- | --- | --- | --- | --- | --- | --- | --- | --- | --- |
| Lower gingiva | 1 | 3 | 11 | 8 | 5 | 20 | 17 | 4 | 69 |
| Upper gingiva | 0 | 4 | 7 | 9 | 5 | 20 | 11 | 4 | 60 |
| Gingiva, total | 1 | 7 | 18 | 17 | 10 | 40 | 28 | 8 | 129 |
| Tongue | 3 | 4 | 9 | 3 | 2 | 16 | 7 | 4 | 48 |
| Lip | 1 | 3 | 9 | 7 | 10 | 21 | 22 | 10 | 83 |
| Floor of the mouth | 2 | 2 | 0 | 1 | 5 | 6 | 3 | 1 | 20 |
| Buccal mucosa | 0 | 7 | 3 | 3 | 5 | 1 | 0 | 4 | 23 |
| Palate | 0 | 2 | 2 | 0 | 3 | 2 | 2 | 1 | 12 |
| Total | 7 | 25 | 41 | 31 | 35 | 86 | 62 | 28 | 315 |

Supplementary Table S5. Histopathological diagnoses by systemic disease subgroup.

| **Diagnosis** | **Organ recipient** | **Neurology** | **Oncology** | **Cardiology** | **Immunodeficiency** | **Other** | **Total** |
| --- | --- | --- | --- | --- | --- | --- | --- |
| Squamous papilloma | 5 | 5 | 2 | 1 | 1 | 0 | 14 |
| Mucocele | 0 | 4 | 0 | 2 | 1 | 1 | 8 |
| PTLD | 4 | 0 | 0 | 0 | 0 | 0 | 4 |
| Inflammatory granulation tissue | 26 | 3 | 2 | 2 | 7 | 2 | 42 |
| Fibroma | 2 | 3 | 1 | 2 | 2 | 1 | 11 |
| Haemangioma/vascular lesion | 0 | 2 | 3 | 1 | 2 | 0 | 8 |
| Epulis | 0 | 0 | 0 | 1 | 2 | 0 | 3 |
| Giant cell lesion | 0 | 0 | 0 | 0 | 0 | 2 | 2 |
| Epidermal/epithelial cyst | 1 | 0 | 0 | 0 | 0 | 0 | 1 |
| Other diagnoses | 5 | 2 | 0 | 1 | 3 | 0 | 11 |
| Total | 43 | 19 | 8 | 10 | 18 | 6 | 104 |

Supplementary Table S6. Histopathological diagnoses by age group and systemic status.

| **Diagnosis** | **Sys <1** | **Sys 1-6** | **Sys 6-12** | **Sys 12-18** | **Healthy <1** | **Healthy 1-6** | **Healthy 6-12** | **Healthy 12-18** | **Total** |
| --- | --- | --- | --- | --- | --- | --- | --- | --- | --- |
| Squamous papilloma | 0 | 4 | 6 | 4 | 1 | 12 | 6 | 2 | 35 |
| Mucocele | 2 | 2 | 3 | 1 | 14 | 23 | 22 | 7 | 74 |
| PTLD | 0 | 3 | 0 | 1 | 0 | 0 | 0 | 0 | 4 |
| Inflammatory granulation tissue | 3 | 10 | 19 | 10 | 3 | 6 | 8 | 7 | 66 |
| Fibroma | 0 | 1 | 5 | 5 | 7 | 15 | 9 | 4 | 46 |
| Haemangioma/vascular lesion | 1 | 0 | 2 | 5 | 0 | 9 | 4 | 4 | 25 |
| Epulis | 0 | 1 | 0 | 2 | 2 | 2 | 5 | 1 | 13 |
| Histiocytosis | 0 | 0 | 0 | 0 | 2 | 5 | 0 | 0 | 7 |
| Giant cell lesion | 1 | 0 | 1 | 0 | 0 | 1 | 3 | 0 | 6 |
| Epidermal/epithelial cyst | 0 | 1 | 0 | 0 | 1 | 2 | 1 | 0 | 5 |
| Other diagnoses | 0 | 3 | 6 | 2 | 5 | 11 | 4 | 3 | 34 |
| Total | 7 | 25 | 41 | 31 | 35 | 86 | 62 | 28 | 315 |

Supplementary Table S7. Histopathological diagnoses by anatomical location.

| **Diagnosis/group** | **Lower gingiva** | **Upper gingiva** | **Tongue** | **Lip** | **Floor** | **Buccal mucosa** | **Palate** | **Total** |
| --- | --- | --- | --- | --- | --- | --- | --- | --- |
| Squamous papilloma, healthy | 4 | 5 | 7 | 3 | 1 | 0 | 1 | 21 |
| Squamous papilloma, systemic | 2 | 4 | 3 | 3 | 1 | 0 | 1 | 14 |
| Mucocele, healthy | 0 | 0 | 1 | 52 | 9 | 4 | 0 | 66 |
| Mucocele, systemic | 0 | 0 | 0 | 4 | 3 | 0 | 1 | 8 |
| PTLD, healthy | 0 | 0 | 0 | 0 | 0 | 0 | 0 | 0 |
| PTLD, systemic | 0 | 0 | 1 | 0 | 0 | 3 | 0 | 4 |
| Inflammatory granulation tissue, healthy | 8 | 9 | 2 | 3 | 1 | 0 | 1 | 24 |
| Inflammatory granulation tissue, systemic | 8 | 7 | 8 | 10 | 1 | 6 | 2 | 42 |
| Haemangioma/vascular lesion, healthy | 1 | 4 | 7 | 2 | 0 | 2 | 1 | 17 |
| Haemangioma/vascular lesion, systemic | 1 | 2 | 4 | 1 | 0 | 0 | 0 | 8 |
| Fibroma, healthy | 12 | 12 | 4 | 2 | 0 | 2 | 2 | 34 |
| Fibroma, systemic | 2 | 5 | 1 | 1 | 0 | 0 | 2 | 11 |
| Epulis, healthy | 5 | 5 | 0 | 0 | 0 | 0 | 0 | 10 |
| Epulis, systemic | 2 | 1 | 0 | 0 | 0 | 0 | 0 | 3 |
| Histiocytosis, healthy | 5 | 2 | 0 | 0 | 0 | 0 | 0 | 7 |
| Histiocytosis, systemic | 0 | 0 | 0 | 0 | 0 | 0 | 0 | 0 |
| Giant cell lesion, healthy | 4 | 0 | 0 | 0 | 0 | 0 | 0 | 4 |
| Giant cell lesion, systemic | 2 | 0 | 0 | 0 | 0 | 0 | 0 | 2 |
| Epidermal/epithelial cyst, healthy | 0 | 0 | 0 | 1 | 3 | 0 | 0 | 4 |
| Epidermal/epithelial cyst, systemic | 0 | 0 | 1 | 0 | 0 | 0 | 0 | 1 |
| Other diagnoses, healthy | 2 | 9 | 6 | 1 | 1 | 4 | 0 | 23 |
| Other diagnoses, systemic | 2 | 4 | 3 | 0 | 0 | 2 | 1 | 12 |
| Total | 60 | 69 | 48 | 83 | 20 | 23 | 12 | 315 |
